# Supplementary material
Source: publisher site journal article supplement (https://jhr.pensoft.net/article/87165/download/suppl/32/)
Supplement: Supplementary file 1

## Sheet: dallat1_AlleleReport
fragmentation_analysis_code	individual_code	nest_code	date	country	village	Willage__genotype_diversity_analysis	sub_locality	nest_substrate	subsample_reduced_population_genecti_analysis	location_GPS	HETEROZIGOSITY_ANALYSIS_LOCATION	nest_analysis(maternity)	old_female	individual_code	role	17a	17b	36a	36b	23a	23b	9a	9b	12a	12b	67a	67b
AL18-111_2_PbC03_C03.fsa	AL18-111_2	AL18-111	2018-06-22	Albania	Skadar					42.0443861N, 19.4770675E		nest	no	AL18-111_2	offspring	126	127	240	274	101	101	233	235	214	214	98	98
AL18-111_3_L4D03_D03.fsa	AL18-111_3	AL18-111	2018-06-22	Albania	Skadar					42.0443861N, 19.4770675E		nest	no	AL18-111_3	offspring	126	127	240	274	101	101	233	235	214	214	98	98
AL18-111_5_L4E03_E03.fsa	AL18-111_5	AL18-111	2018-06-22	Albania	Skadar					42.0443861N, 19.4770675E		nest	no	AL18-111_5	offspring	126	127	240	274	101	101	233	235	214	214	98	98
AL18-111_6_L4F03_F03.fsa	AL18-111_6	AL18-111	2018-06-22	Albania	Skadar					42.0443861N, 19.4770675E		nest	no	AL18-111_6	offspring	126	127	240	274	101	101	233	235	214	214	98	98
AL18-111_7_L4G03_G03.fsa	AL18-111_7	AL18-111	2018-06-22	Albania	Skadar					42.0443861N, 19.4770675E		nest	no	AL18-111_7	offspring	126	127	240	274	101	101	233	235	214	214	98	98
AL18-111_8_FstH03_H03.fsa	AL18-111_8	AL18-111	2018-06-22	Albania	Skadar					42.0443861N, 19.4770675E	Other	nest	yes	AL18-111_8	mother	126	127	240	274	101	101	233	235	214	214	98	98
AL18-343_1_L4A04_A04.fsa	AL18-343_1	AL18-343	2018-06-29	Albania	Rinas airport					41.4136633N, 19.7079403E		nest	no	AL18-343_1	offspring	126	149	259	266	99	101	233	235	214	214	98	100
AL18-343_2_L4B04_B04.fsa	AL18-343_2	AL18-343	2018-06-29	Albania	Rinas airport					41.4136633N, 19.7079403E		nest	no	AL18-343_2	offspring	126	149	259	266	99	101	233	235	214	214	98	100
AL18-343_3_L2C04_C04.fsa	AL18-343_3	AL18-343	2018-06-29	Albania	Rinas airport					41.4136633N, 19.7079403E		nest	no	AL18-343_3	offspring	126	149	259	266	99	101	233	235	214	214	98	100
AL18-343_4_asiED04_D04.fsa	AL18-343_4	AL18-343	2018-06-29	Albania	Rinas airport					41.4136633N, 19.7079403E		nest	no	AL18-343_4	offspring	126	149	259	266	99	101	233	235	214	214	98	100
AL18-343_5_EE04_E04.fsa	AL18-343_5	AL18-343	2018-06-29	Albania	Rinas airport					41.4136633N, 19.7079403E		nest	no	AL18-343_5	offspring	126	149	259	266	99	101	233	235	214	214	98	100
AL18-343_7_FH09_H09.fsa	AL18-343_7	AL18-343	2018-06-29	Albania	Rinas airport					41.4136633N, 19.7079403E	Other	nest	yes	AL18-343_7	mother	126	149	259	266	99	101	233	235	214	214	98	100
AL-EX-GRJ1FstH08_H08.fsa	AL-EX-GRJ1	AL-EX-GRJ1	2019-09-24	Albania	Girjokaster					40.0985100N, 20.1253050E	Other		yes	AL-EX-GRJ1	NA	126	140	255	261	101	101	235	256	212	212	95	95
KR18-66_1_L4H01_H01.fsa	KR18-66_1	KR18-66	2018-06-15	Crete	Georgiopoli					35.3545514N, 24.2575292E		nest	no	KR18-66_1	offspring	143	147	261	266	101	101	233	247	212	212	95	98
KR18-66_2_L4F09_F09.fsa	KR18-66_2	KR18-66	2018-06-15	Crete	Georgiopoli					35.3545514N, 24.2575292E		nest	no	KR18-66_2	offspring	143	147	261	266	101	101	233	247	212	212	95	98
KR18-66_3_L3G09_G09.fsa	KR18-66_3	KR18-66	2018-06-15	Crete	Georgiopoli					35.3545514N, 24.2575292E		nest	no	KR18-66_3	offspring	143	147	261	266	101	101	233	247	212	212	95	98
KR18-66_4_L2C02_C02.fsa	KR18-66_4	KR18-66	2018-06-15	Crete	Georgiopoli					35.3545514N, 24.2575292E		nest	no	KR18-66_4	offspring	143	147	261	266	101	101	233	247	212	212	95	98
KR18-66_5_L2D02_D02.fsa	KR18-66_5	KR18-66	2018-06-15	Crete	Georgiopoli					35.3545514N, 24.2575292E		nest	no	KR18-66_5	offspring	143	147	261	266	101	101	233	247	212	212	95	98
KR18-66_6_EE02_E02.fsa	KR18-66_6	KR18-66	2018-06-15	Crete	Georgiopoli					35.3545514N, 24.2575292E		nest	no	KR18-66_6	offspring	143	147	261	266	101	101	233	247	212	212	95	98
KR18-66_7_FstF02_F02.fsa	KR18-66_7	KR18-66	2018-06-15	Crete	Georgiopoli	Georgiopoli		Phoeniculum_vulgare	1	35.3545514N, 24.2575292E	Crete	nest	yes	KR18-66_7	mother	143	147	261	266	101	101	233	247	212	212	95	98
KR18-7_1_L4A01_A01.fsa	KR18-7_1	KR18-7	2018-06-13	Crete	Chania airport					35.5450167N, 24.1365278E		nest	no	KR18-7_1	offspring	153	160	261	265	99	101	233	235	212	214	98	102
KR18-7_2_L3B01_B01.fsa	KR18-7_2	KR18-7	2018-06-13	Crete	Chania airport					35.5450167N, 24.1365278E		nest	no	KR18-7_2	offspring	153	160	261	265	99	101	233	235	212	214	98	102
KR18-7_3_L2C01_C01.fsa	KR18-7_3	KR18-7	2018-06-13	Crete	Chania airport					35.5450167N, 24.1365278E		nest	no	KR18-7_3	offspring	153	160	261	265	99	101	233	235	212	214	98	102
KR18-7_4_L2D01_D01.fsa	KR18-7_4	KR18-7	2018-06-13	Crete	Chania airport					35.5450167N, 24.1365278E		nest	no	KR18-7_4	offspring	153	160	261	265	99	101	233	235	212	214	98	102
KR18-7_5_EE01_E01.fsa	KR18-7_5	KR18-7	2018-06-13	Crete	Chania airport					35.5450167N, 24.1365278E		nest	no	KR18-7_5	offspring	153	160	261	265	99	101	233	235	212	214	98	102
KR18-7_6_EF01_F01.fsa	KR18-7_6	KR18-7	2018-06-13	Crete	Chania airport					35.5450167N, 24.1365278E		nest	no	KR18-7_6	offspring	153	160	261	265	99	101	233	235	212	214	98	102
KR18-7_7_FstG01_G01.fsa	KR18-7_7	KR18-7	2018-06-13	Crete	Chania airport	Chania airport				35.5450167N, 24.1365278E	Crete	nest	yes	KR18-7_7	mother	153	160	261	265	99	101	233	235	212	214	98	102
KR18-74_2_EH02_H02.fsa	KR18-74_2	KR18-74	2018-06-15	Crete	Georgiopoli					35.3545514N, 24.2575292E		nest	no	KR18-74_2	offspring	145	149	266	274	99	101	210	233	212	212	95	102
KR18-74_3_EA03_A03.fsa	KR18-74_3	KR18-74	2018-06-15	Crete	Georgiopoli					35.3545514N, 24.2575292E		nest	no	KR18-74_3	offspring	145	149	266	274	99	101	210	233	212	212	95	102
KR18-74_4_FstB03_B03.fsa	KR18-74_4	KR18-74	2018-06-15	Crete	Georgiopoli	Georgiopoli		Rubus		35.3545514N, 24.2575292E	Crete	nest	yes	KR18-74_4	mother	145	149	266	274	99	101	210	233	212	212	95	102
KR20-446(3)L4G01_G01.fsa	KR20-446_3	KR20-446	2020-07-16	Crete	Stavros					35.5867592N, 24.0922822E		nest	no	KR20-446_3	offspring	121	153	255	261	99	101	208	235	214	214	95	98
KR20-446(4)L3H01_H01.fsa	KR20-446_4	KR20-446	2020-07-16	Crete	Stavros					35.5867592N, 24.0922822E		nest	no	KR20-446_4	offspring	121	153	255	261	99	101	208	235	214	214	95	98
KR20-446(5)FstA02_A02.fsa	KR20-446_5	KR20-446	2020-07-16	Crete	Stavros	Chania airport				35.5867592N, 24.0922822E	Crete	nest	yes	KR20-446_5	mother	121	153	255	261	99	101	208	235	214	214	95	98
KR20-5(1)FimA01_A01.fsa	KR20-5_1	KR20-5	2020-07-08	Crete	Chania airport					35.5450167N, 24.1365278E		nest	no	KR20-5_1	offspring	121	153	255	261	99	101	208	235	214	214	95	98
KR20-5(2)FimB01_B01.fsa	KR20-5_2	KR20-5	2020-07-08	Crete	Chania airport					35.5450167N, 24.1365278E		nest	no	KR20-5_2	offspring	121	153	255	261	99	101	208	235	214	214	95	98
KR20-5(3)FimC01_C01.fsa	KR20-5_3	KR20-5	2020-07-08	Crete	Chania airport					35.5450167N, 24.1365278E		nest	no	KR20-5_3	offspring	121	153	255	261	99	101	208	235	214	214	95	98
KR20-5(5)FimD01_D01.fsa	KR20-5_5	KR20-5	2020-07-08	Crete	Chania airport					35.5450167N, 24.1365278E		nest	no	KR20-5_5	offspring	121	153	255	261	99	101	208	235	214	214	95	98
KR20-5(6)PbE01_E01.fsa	KR20-5_6	KR20-5	2020-07-08	Crete	Chania airport					35.5450167N, 24.1365278E		nest	no	KR20-5_6	offspring	121	153	255	261	99	101	208	235	214	214	95	98
KR20-5(7)FF01_F01.fsa	KR20-5_7	KR20-5	2020-07-08	Crete	Chania airport	Chania airport				35.5450167N, 24.1365278E	Crete	nest	yes	KR20-5_7	mother	121	153	255	261	99	101	208	235	214	214	95	98
KR20-592(1)PbB02_B02.fsa	KR20-592_1	KR20-592	2020-08-26	Crete	Georgiopoli					35.3545514N, 24.2575292E		nest	no	KR20-592_1	offspring	147	147	266	274	99	101	210	233	212	212	95	102
KR20-592(2)PbC02_C02.fsa	KR20-592_2	KR20-592	2020-08-26	Crete	Georgiopoli					35.3545514N, 24.2575292E		nest	no	KR20-592_2	offspring	147	147	266	274	99	101	210	233	212	212	95	102
KR20-592(3)FstD02_D02.fsa	KR20-592_3	KR20-592	2020-08-26	Crete	Georgiopoli	Georgiopoli		Rubus	1	35.3545514N, 24.2575292E	Crete	nest	yes	KR20-592_3	mother	147	147	266	274	99	101	210	233	212	212	95	102
KR18-73_3_FstG10_G10.fsa	KR18-73_3	KR18-73	2018-06-15	Crete	Georgiopoli	Georgiopoli		Rubus	1	35.3545514N, 24.2575292E	Crete		yes	KR18-73_3	NA	147	147	268	272	99	101	210	233	212	212	95	102
KR20-113(1)FG02_G02.fsa	KR20-113_1	KR20-113	2020-07-12	Crete	Georgiopoli					35.3545514N, 24.2575292E			no	KR20-113_1	offspring	143	143	270	272	97	99	208	233	212	212	98	102
KR20-113(2)PbH02_H02.fsa	KR20-113_2	KR20-113	2020-07-12	Crete	Georgiopoli					35.3545514N, 24.2575292E			no	KR20-113_2	offspring	143	143	270	272	97	99	208	233	212	212	98	102
KR20-113(3)FA03_A03.fsa	KR20-113_3	KR20-113	2020-07-12	Crete	Georgiopoli					35.3545514N, 24.2575292E			no	KR20-113_3	offspring	143	143	270	272	97	99	208	233	212	212	98	102
KR20-113(4)PeB03_B03.fsa	KR20-113_4	KR20-113	2020-07-12	Crete	Georgiopoli					35.3545514N, 24.2575292E			no	KR20-113_4	offspring	143	143	270	272	97	99	208	233	212	212	98	102
KR20-113(5)FC03_C03.fsa	KR20-113_5	KR20-113	2020-07-12	Crete	Georgiopoli					35.3545514N, 24.2575292E			no	KR20-113_5	offspring	143	143	270	272	97	99	208	233	212	212	98	102
KR20-113(6)PbD03_D03.fsa	KR20-113_6	KR20-113	2020-07-12	Crete	Georgiopoli					35.3545514N, 24.2575292E			no	KR20-113_6	offspring	143	143	270	272	97	99	208	233	212	212	98	102
KR20-113(7)FE03_E03.fsa	KR20-113_7	KR20-113	2020-07-12	Crete	Georgiopoli	Georgiopoli		Apicacea	1	35.3545514N, 24.2575292E	Crete		yes	KR20-113_7	mother	143	143	270	272	97	99	208	233	212	212	96	98
KR20-179FC07_C07.fsa	KR20-179	KR20-179	2020-07-13	Crete	Georgiopoli	Georgiopoli		Rubus	1	35.3498144N, 24.2570286E	Crete		yes	KR20-179	NA	143	149	261	266	101	101	233	247	212	212	95	98
KR20-186FD07_D07.fsa	KR20-186	KR20-186	2020-07-13	Crete	Georgiopoli	Georgiopoli		Rubus		35.3498144N, 24.2570286E	Crete		yes	KR20-186	NA	145	147	255	261	101	101	233	247	212	212	95	98
KR20-478(2)FG03_G03.fsa	KR20-478_2	KR20-478	2020-08-25	Crete	Georgiopoli	Georgiopoli		Rubus	1	35.3545514N, 24.2575292E	Crete		yes	KR20-478_2	NA	143	143	270	272	97	99	208	233	212	212	98	102
KR20-479FF03_F03.fsa	KR20-479	KR20-479	2020-08-25	Crete	Georgiopoli	Georgiopoli		Rubus		35.3545514N, 24.2575292E	Crete		yes	KR20-479	NA	143	143	270	272	97	99	208	233	212	212	98	102
KR20-485FG04_G04.fsa	KR20-485	KR20-485	2020-08-25	Crete	Georgiopoli	Georgiopoli		Rubus		35.3545514N, 24.2575292E	Crete		yes	KR20-485	NA	160	160	265	270	103	103	208	233	207	207	105	105
KR20-506(2)FA04_A04.fsa	KR20-506_2	KR20-506	2020-08-25	Crete	Georgiopoli	Georgiopoli		Rubus		35.3545514N, 24.2575292E	Crete		yes	KR20-506_2	NA	143	143	270	272	97	99	208	233	212	212	98	102
KR20-523FH04_H04.fsa	KR20-523	KR20-523	2020-08-25	Crete	Georgiopoli	Georgiopoli		Rubus		35.3545514N, 24.2575292E	Crete		yes	KR20-523	NA	143	143	268	272	99	101	208	233	214	214	95	100
KR20-536(2)FB04_B04.fsa	KR20-536_2	KR20-536	2020-08-25	Crete	Georgiopoli	Georgiopoli		Rubus		35.3545514N, 24.2575292E	Crete		yes	KR20-536_2	NA	143	147	266	272	99	101	210	233	212	212	95	102
KR20-76FA07_A07.fsa	KR20-76	KR20-76	2020-07-11	Crete	Marmaketo					35.1923994N, 25.4970583E	Crete		yes	KR20-76	NA	143	143	266	272	99	101	210	233	212	212	95	102
KR20-D144FB06_B06.fsa	KR20-D144	KR20-D144	2020-08-27	Crete	Georgiopoli	Georgiopoli		Rubus	1	35.3545514N, 24.2575292E	Crete		yes	KR20-D144	NA	143	143	270	272	97	99	208	233	212	212	98	102
KR20-D157FD06_D06.fsa	KR20-D157	KR20-D157	2020-08-27	Crete	Georgiopoli	Georgiopoli		Rubus		35.3545514N, 24.2575292E	Crete		yes	KR20-D157	NA	143	143	270	272	97	99	208	233	212	212	98	102
KR20-D170FE06_E06.fsa	KR20-D170	KR20-D170	2020-08-28	Crete	Georgiopoli	Georgiopoli		Rubus	1	35.3454203N, 24.2592714E	Crete		yes	KR20-D170	NA	160	160	265	270	101	101	208	233	212	212	95	102
KR20-D180FF06_F06.fsa	KR20-D180	KR20-D180	2020-08-28	Crete	Georgiopoli	Georgiopoli		Rubus		35.3454203N, 24.2592714E	Crete		yes	KR20-D180	NA	160	160	265	270	101	101	208	233	212	212	95	102
KR20-D36FB07_B07.fsa	KR20-D36	KR20-D36	2020-08-25	Crete	Georgiopoli	Georgiopoli		Rubus	1	35.3545514N, 24.2575292E	Crete		yes	KR20-D36	NA	143	143	270	272	97	99	208	233	212	212	98	102
KR20-D70FC04_C04.fsa	KR20-D70	KR20-D70	2020-08-26	Crete	Georgiopoli	Georgiopoli		Rubus	1	35.3545514N, 24.2575292E	Crete		yes	KR20-D70	NA	143	147	261	266	101	101	233	247	212	212	95	98
KR20-D91FD04_D04.fsa	KR20-D91	KR20-D91	2020-08-26	Crete	Georgiopoli	Georgiopoli		Rubus	1	35.3545514N, 24.2575292E	Crete		yes	KR20-D91	NA	140	143	270	274	97	99	208	233	212	212	98	102
KR20-J32FE07_E07.fsa	KR20-J32	KR20-J32	2020-08-25	Crete	Georgiopoli	Georgiopoli		Rubus	1	35.3545514N, 24.2575292E	Crete		yes	KR20-J32	NA	143	143	265	272	97	99	208	233	212	212	98	102
KR20-J34FF07_F07.fsa	KR20-J34	KR20-J34	2020-08-25	Crete	Georgiopoli	Georgiopoli		Rubus		35.3545514N, 24.2575292E	Crete		yes	KR20-J34	NA	143	143	263	272	97	99	208	233	212	212	98	102
KR20-J35FG07_G07.fsa	KR20-J35	KR20-J35	2020-08-25	Crete	Georgiopoli	Georgiopoli		Rubus		35.3545514N, 24.2575292E	Crete		yes	KR20-J35	NA	160	160	265	270	101	101	208	233	212	212	95	102
KR20-J43FH07_H07.fsa	KR20-J43	KR20-J43	2020-08-25	Crete	Georgiopoli	Georgiopoli		Rubus		35.3545514N, 24.2575292E	Crete		yes	KR20-J43	NA	143	143	270	272	97	99	208	233	212	212	98	102
KR20-J96(3)FstF02_F02.fsa	KR20-J96_3	KR20-J96	2020-08-26	Crete	Georgiopoli	Georgiopoli		Rubus		35.3545514N, 24.2575292E	Crete		yes	KR20-J96_3	NA	143	143	270	272	97	99	208	233	212	212	98	102
KR20-T70(2)FF04_F04.fsa	KR20-T70_2	KR20-T70	2020-08-25	Crete	Georgiopoli	Georgiopoli		Rubus	1	35.3545514N, 24.2575292E	Crete		yes	KR20-T70_2	NA	143	143	270	272	97	99	208	233	212	212	98	102
CY19-1160_1_Pb_E10.fsa	CY19-1160_1	CY19-1160	2019-09-22	Cyprus	Agios Theodoros					34.7629750N, 33.4071689E		nest	no	CY19-1160_1	offspring	143	143	225	268	101	101	241	243	212	212	96	98
CY19-1160_2_L4_F10.fsa	CY19-1160_2	CY19-1160	2019-09-22	Cyprus	Agios Theodoros					34.7629750N, 33.4071689E		nest	no	CY19-1160_2	offspring	143	143	225	268	101	101	241	243	212	212	96	98
CY19-1160_3_L2_G10.fsa	CY19-1160_3	CY19-1160	2019-09-22	Cyprus	Agios Theodoros					34.7629750N, 33.4071689E		nest	no	CY19-1160_3	offspring	143	143	225	268	101	101	241	243	212	212	96	98
CY19-1160_4_Fst_H10.fsa	CY19-1160_4	CY19-1160	2019-09-22	Cyprus	Agios Theodoros	Agios Theodoros				34.7629750N, 33.4071689E	Cyprus	nest	yes	CY19-1160_4	mother	143	143	225	268	101	101	241	243	212	212	96	98
CY19-15_1_E_F01.fsa	CY19-15_1	CY19-15	2019-06-15	Cyprus	Mathiatis					34.9615050N, 33.3277300E		nest	no	CY19-15_1	offspring	120	120	225	268	101	101	229	241	212	212	95	98
CY19-15_2_E_G01.fsa	CY19-15_2	CY19-15	2019-06-15	Cyprus	Mathiatis					34.9615050N, 33.3277300E		nest	no	CY19-15_2	offspring	120	120	225	268	101	101	229	241	212	212	95	98
CY19-15_3_Fst_H01.fsa	CY19-15_3	CY19-15	2019-06-15	Cyprus	Mathiatis	Mathiatis				34.9615050N, 33.3277300E	Cyprus	nest	yes	CY19-15_3	mother	120	120	225	268	101	101	229	241	212	212	95	98
CY19-165_2_L4_A11.fsa	CY19-165_2	CY19-165	2019-06-18	Cyprus	Lefkara					34.8932964N, 33.3255733E		nest	no	CY19-165_2	offspring	143	145	225	268	101	101	243	243	212	212	96	98
CY19-165_3_L4_B11.fsa	CY19-165_3	CY19-165	2019-06-18	Cyprus	Lefkara					34.8932964N, 33.3255733E		nest	no	CY19-165_3	offspring	143	145	225	268	101	101	243	243	212	212	96	98
CY19-165_4_L4_C11.fsa	CY19-165_4	CY19-165	2019-06-18	Cyprus	Lefkara					34.8932964N, 33.3255733E		nest	no	CY19-165_4	offspring	143	145	225	268	101	101	243	243	212	212	96	98
CY19-165_5_L3_D11.fsa	CY19-165_5	CY19-165	2019-06-18	Cyprus	Lefkara					34.8932964N, 33.3255733E		nest	no	CY19-165_5	offspring	143	145	225	268	101	101	243	243	212	212	96	98
CY19-165_6_Fst_E11.fsa	CY19-165_6	CY19-165	2019-06-18	Cyprus	Lefkara	Lefkara	walley	Foeniculum_vulgare	1	34.8932964N, 33.3255733E	Cyprus	nest	yes	CY19-165_6	mother	143	145	225	268	101	101	243	243	212	212	96	98
CY19-274_1_E_C02.fsa	CY19-274_1	CY19-274	2019-06-24	Cyprus	Kofinou					34.8292703N, 33.3717064E		nest	no	CY19-274_1	offspring	143	143	225	268	101	101	241	243	212	212	96	98
CY19-274_2_Fst_D02.fsa	CY19-274_2	CY19-274	2019-06-24	Cyprus	Kofinou	Lefkara	Kofinou	Foeniculum_vulgare	1	34.8292703N, 33.3717064E	Cyprus	nest	yes	CY19-274_2	mother	143	143	225	268	101	101	241	243	212	212	96	98
CY19-310_02_E_E02.fsa	CY19-310_02	CY19-310	2019-06-25	Cyprus	Agios Theodoros					34.7629750N, 33.4071689E		nest	no	CY19-310_02	offspring	143	143	225	268	101	101	241	243	212	212	96	98
CY19-310_03_Fst_F02.fsa	CY19-310_03	CY19-310	2019-06-25	Cyprus	Agios Theodoros	Agios Theodoros				34.7629750N, 33.4071689E	Cyprus	nest	yes	CY19-310_03	mother	143	143	225	268	101	101	241	243	212	212	96	98
CY19-316_02_Pb_G02.fsa	CY19-316_02	CY19-316	2019-06-25	Cyprus	Agios Theodoros					34.7629750N, 33.4071689E		nest	no	CY19-316_02	offspring	120	120	225	268	101	105	229	241	212	212	95	98
CY19-316_04_Pb_H02.fsa	CY19-316_04	CY19-316	2019-06-25	Cyprus	Agios Theodoros					34.7629750N, 33.4071689E		nest	no	CY19-316_04	offspring	120	120	225	268	101	105	229	241	212	212	95	98
CY19-316_05_L4_A03.fsa	CY19-316_05	CY19-316	2019-06-25	Cyprus	Agios Theodoros					34.7629750N, 33.4071689E		nest	no	CY19-316_05	offspring	120	120	225	268	101	105	229	241	212	212	95	98
CY19-316_06_L4_B03.fsa	CY19-316_06	CY19-316	2019-06-25	Cyprus	Agios Theodoros					34.7629750N, 33.4071689E		nest	no	CY19-316_06	offspring	120	120	225	268	101	105	229	241	212	212	95	98
CY19-316_07_L4_C03.fsa	CY19-316_07	CY19-316	2019-06-25	Cyprus	Agios Theodoros					34.7629750N, 33.4071689E		nest	no	CY19-316_07	offspring	120	120	225	268	101	105	229	241	212	212	95	98
CY19-316_08_L4_D03.fsa	CY19-316_08	CY19-316	2019-06-25	Cyprus	Agios Theodoros					34.7629750N, 33.4071689E		nest	no	CY19-316_08	offspring	120	120	225	268	101	105	229	241	212	212	95	98
CY19-316_09_L3_E03.fsa	CY19-316_09	CY19-316	2019-06-25	Cyprus	Agios Theodoros					34.7629750N, 33.4071689E		nest	no	CY19-316_09	offspring	120	120	225	268	101	105	229	241	212	212	95	98
CY19-316_10_Fst_F03.fsa	CY19-316_10	CY19-316	2019-06-25	Cyprus	Agios Theodoros	Agios Theodoros				34.7629750N, 33.4071689E	Cyprus	nest	yes	CY19-316_10	mother	120	120	225	268	101	105	229	241	212	212	95	98
CY19-326_2_L4_G03.fsa	CY19-326_2	CY19-326	2019-06-26	Cyprus	Pyrgos					34.7277206N, 33.1875267E		nest	no	CY19-326_2	offspring	143	145	225	268	101	101	241	243	212	212	96	98
CY19-326_3_Fst_H03.fsa	CY19-326_3	CY19-326	2019-06-26	Cyprus	Pyrgos	Pyrgos				34.7277206N, 33.1875267E	Cyprus	nest	yes	CY19-326_3	mother	143	145	225	268	101	101	241	243	212	212	96	98
CY19-331_1_L4_A04.fsa	CY19-331_1	CY19-331	2019-06-26	Cyprus	Pyrgos					34.7277206N, 33.1875267E		nest	no	CY19-331_1	offspring	120	120	225	268	101	101	241	241	212	212	96	98
CY19-331_2_L3_B04.fsa	CY19-331_2	CY19-331	2019-06-26	Cyprus	Pyrgos					34.7277206N, 33.1875267E		nest	no	CY19-331_2	offspring	120	120	225	268	101	101	241	241	212	212	96	98
CY19-331_3_E_C04.fsa	CY19-331_3	CY19-331	2019-06-26	Cyprus	Pyrgos					34.7277206N, 33.1875267E		nest	no	CY19-331_3	offspring	120	120	225	268	101	101	241	241	212	212	96	98
CY19-331_5_Fst_E04.fsa	CY19-331_5	CY19-331	2019-06-26	Cyprus	Pyrgos	Pyrgos				34.7277206N, 33.1875267E	Cyprus	nest	yes	CY19-331_5	mother	120	120	225	268	101	101	241	241	212	212	96	98
CY19-336_1_L2_F04.fsa	CY19-336_1	CY19-336	2019-06-26	Cyprus	Pyrgos					34.7277206N, 33.1875267E		nest	no	CY19-336_1	offspring	120	120	225	268	101	101	241	241	212	212	96	98
CY19-336_2_L1_G04.fsa	CY19-336_2	CY19-336	2019-06-26	Cyprus	Pyrgos					34.7277206N, 33.1875267E		nest	no	CY19-336_2	offspring	120	120	225	268	101	101	241	241	212	212	96	98
CY19-336_3_E_H04.fsa	CY19-336_3	CY19-336	2019-06-26	Cyprus	Pyrgos					34.7277206N, 33.1875267E		nest	no	CY19-336_3	offspring	120	120	225	268	101	101	241	241	212	212	96	98
CY19-336_4_Fst_A05.fsa	CY19-336_4	CY19-336	2019-06-26	Cyprus	Pyrgos	Pyrgos				34.7277206N, 33.1875267E	Cyprus	nest	yes	CY19-336_4	mother	120	120	225	268	101	101	241	241	212	212	96	98
CY19-348_01_Pb_B05.fsa	CY19-348_01	CY19-348	2019-06-27	Cyprus	Yermasoya					34.7317875N, 33.0864392E		nest	no	CY19-348_01	offspring	120	120	225	268	101	101	241	241	212	212	96	98
CY19-348_02_Pb_C05.fsa	CY19-348_02	CY19-348	2019-06-27	Cyprus	Yermasoya					34.7317875N, 33.0864392E		nest	no	CY19-348_02	offspring	120	120	225	268	101	101	241	241	212	212	96	98
CY19-348_03_L4_D05.fsa	CY19-348_03	CY19-348	2019-06-27	Cyprus	Yermasoya					34.7317875N, 33.0864392E		nest	no	CY19-348_03	offspring	120	120	225	268	101	101	241	241	212	212	96	98
CY19-348_04_L4_E05.fsa	CY19-348_04	CY19-348	2019-06-27	Cyprus	Yermasoya					34.7317875N, 33.0864392E		nest	no	CY19-348_04	offspring	120	120	225	268	101	101	241	241	212	212	96	98
CY19-348_05_L4_F05.fsa	CY19-348_05	CY19-348	2019-06-27	Cyprus	Yermasoya					34.7317875N, 33.0864392E		nest	no	CY19-348_05	offspring	120	120	225	268	101	101	241	241	212	212	96	98
CY19-348_06_L4_G05.fsa	CY19-348_06	CY19-348	2019-06-27	Cyprus	Yermasoya					34.7317875N, 33.0864392E		nest	no	CY19-348_06	offspring	120	120	225	268	101	101	241	241	212	212	96	98
CY19-348_07_L3_H05.fsa	CY19-348_07	CY19-348	2019-06-27	Cyprus	Yermasoya					34.7317875N, 33.0864392E		nest	no	CY19-348_07	offspring	120	120	225	268	101	101	241	241	212	212	96	98
CY19-348_08_L2_A06.fsa	CY19-348_08	CY19-348	2019-06-27	Cyprus	Yermasoya					34.7317875N, 33.0864392E		nest	no	CY19-348_08	offspring	120	120	225	268	101	101	241	241	212	212	96	98
CY19-348_09_E_B06.fsa	CY19-348_09	CY19-348	2019-06-27	Cyprus	Yermasoya					34.7317875N, 33.0864392E		nest	no	CY19-348_09	offspring	120	120	225	268	101	101	241	241	212	212	96	98
CY19-348_10_Fst_C06.fsa	CY19-348_10	CY19-348	2019-06-27	Cyprus	Yermasoya					34.7317875N, 33.0864392E	Cyprus	nest	yes	CY19-348_10	mother	120	120	225	268	101	101	241	241	212	212	96	98
CY19-368_1_L4_D06.fsa	CY19-368_1	CY19-368	2019-08-07	Cyprus	Kofinou					34.8168006N, 33.3689947E		nest	no	CY19-368_1	offspring	120	120	225	268	101	101	241	241	212	212	95	98
CY19-368_2_L4_E06.fsa	CY19-368_2	CY19-368	2019-08-07	Cyprus	Kofinou					34.8168006N, 33.3689947E		nest	no	CY19-368_2	offspring	120	120	225	268	101	101	241	241	212	212	95	98
CY19-368_3_L4_F06.fsa	CY19-368_3	CY19-368	2019-08-07	Cyprus	Kofinou					34.8168006N, 33.3689947E		nest	no	CY19-368_3	offspring	120	120	225	268	101	101	241	241	212	212	95	98
CY19-368_5_Fst_G06.fsa	CY19-368_5	CY19-368	2019-08-07	Cyprus	Kofinou	Lefkara	Kofinou	Foeniculum_vulgare	1	34.8168006N, 33.3689947E	Cyprus	nest	yes	CY19-368_5	mother	120	120	225	268	101	101	241	241	212	212	95	98
CY19-371_3_L4_H06.fsa	CY19-371_3	CY19-371	2019-08-07	Cyprus	Kofinou					34.8168006N, 33.3689947E		nest	no	CY19-371_3	offspring	120	120	225	268	101	101	241	241	212	212	96	98
CY19-371_4_L4_A07.fsa	CY19-371_4	CY19-371	2019-08-07	Cyprus	Kofinou					34.8168006N, 33.3689947E		nest	no	CY19-371_4	offspring	120	120	225	268	101	101	241	241	212	212	96	98
CY19-371_5_L3_B07.fsa	CY19-371_5	CY19-371	2019-08-07	Cyprus	Kofinou					34.8168006N, 33.3689947E		nest	no	CY19-371_5	offspring	120	120	225	268	101	101	241	241	212	212	96	98
CY19-371_6_Fst_C07.fsa	CY19-371_6	CY19-371	2019-08-07	Cyprus	Kofinou	Lefkara	Kofinou	Echinops	1	34.8168006N, 33.3689947E	Cyprus	nest	yes	CY19-371_6	mother	120	120	225	268	101	101	241	241	212	212	96	98
CY19-388_1_E_D07.fsa	CY19-388_1	CY19-388	2019-08-07	Cyprus	Kofinou					34.8242444N, 33.3800892E		nest	no	CY19-388_1	offspring	143	143	225	268	101	101	229	243	212	212	95	98
CY19-388_2_E_E07.fsa	CY19-388_2	CY19-388	2019-08-07	Cyprus	Kofinou					34.8242444N, 33.3800892E		nest	no	CY19-388_2	offspring	143	143	225	268	101	101	229	243	212	212	95	98
CY19-388_3_E_F07.fsa	CY19-388_3	CY19-388	2019-08-07	Cyprus	Kofinou					34.8242444N, 33.3800892E		nest	no	CY19-388_3	offspring	143	143	225	268	101	101	229	243	212	212	95	98
CY19-388_4_Fst_G07.fsa	CY19-388_4	CY19-388	2019-08-07	Cyprus	Kofinou	Lefkara	Kofinou	Rubus	1	34.8242444N, 33.3800892E	Cyprus	nest	yes	CY19-388_4	mother	143	143	225	268	101	101	229	243	212	212	95	98
CY19-394_2_E_H07.fsa	CY19-394_2	CY19-394	2019-08-07	Cyprus	Kofinou					34.8242444N, 33.3800892E		nest	no	CY19-394_2	offspring	143	145	225	268	101	101	241	243	212	212	96	98
CY19-394_3_E_A08.fsa	CY19-394_3	CY19-394	2019-08-07	Cyprus	Kofinou					34.8242444N, 33.3800892E		nest	no	CY19-394_3	offspring	143	145	225	268	101	101	241	243	212	212	96	98
CY19-394_4_Fst_B08.fsa	CY19-394_4	CY19-394	2019-08-07	Cyprus	Kofinou	Lefkara	Kofinou	Rubus		34.8242444N, 33.3800892E	Cyprus	nest	yes	CY19-394_4	mother	143	145	225	268	101	101	241	243	212	212	96	98
CY19-395_1_Fim_C08.fsa	CY19-395_1	CY19-395	2019-08-07	Cyprus	Kofinou					34.8242444N, 33.3800892E		nest	no	CY19-395_1	offspring	120	120	225	268	101	101	241	241	212	212	96	98
CY19-395_2_Fim_D08.fsa	CY19-395_2	CY19-395	2019-08-07	Cyprus	Kofinou					34.8242444N, 33.3800892E		nest	no	CY19-395_2	offspring	120	120	225	268	101	101	241	241	212	212	96	98
CY19-395_3_Fim_E08.fsa	CY19-395_3	CY19-395	2019-08-07	Cyprus	Kofinou					34.8242444N, 33.3800892E		nest	no	CY19-395_3	offspring	120	120	225	268	101	101	241	241	212	212	96	98
CY19-395_4_Fim_F08.fsa	CY19-395_4	CY19-395	2019-08-07	Cyprus	Kofinou					34.8242444N, 33.3800892E		nest	no	CY19-395_4	offspring	120	120	225	268	101	101	241	241	212	212	96	98
CY19-395_5_Fim_G08.fsa	CY19-395_5	CY19-395	2019-08-07	Cyprus	Kofinou					34.8242444N, 33.3800892E		nest	no	CY19-395_5	offspring	120	120	225	230/268	101	101	218	241	207	212	96	98
CY19-395_6_Fim_H08.fsa	CY19-395_6	CY19-395	2019-08-07	Cyprus	Kofinou					34.8242444N, 33.3800892E		nest	no	CY19-395_6	offspring	120	120	225	268	101	101	241	241	212	212	96	98
CY19-395_7_Fst_A09.fsa	CY19-395_7	CY19-395	2019-08-07	Cyprus	Kofinou	Lefkara	Kofinou	Rubus		34.8242444N, 33.3800892E	Cyprus	nest	yes	CY19-395_7	mother	120	120	225	268	101	101	241	241	212	212	96	98
CY19-396_1_E_B09.fsa	CY19-396_1	CY19-396	2019-08-07	Cyprus	Kofinou					34.8242444N, 33.3800892E		nest	no	CY19-396_1	offspring	120	120	225	268	101	105	241	241	212	212	95	98
CY19-396_2_Fst_C09.fsa	CY19-396_2	CY19-396	2019-08-07	Cyprus	Kofinou	Lefkara	Kofinou	Echinops	1	34.8242444N, 33.3800892E	Cyprus	nest	yes	CY19-396_2	mother	120	120	225	268	101	105	241	241	212	212	95	98
CY19-40_1_FimD09_D09.fsa	CY19-40_1	CY19-40	2019-06-16	Cyprus	Mathiatis					34.9631514N, 33.3302672E		nest	no	CY19-40_1	offspring	120	120	225	268	101	101	241	241	212	212	96	98
CY19-40_3_Fim_G11.fsa	CY19-40_3	CY19-40	2019-06-16	Cyprus	Mathiatis					34.9631514N, 33.3302672E		nest	no	CY19-40_3	offspring	120	120	225	268	101	101	241	241	212	212	96	98
CY19-40_5_Fim_H11.fsa	CY19-40_5	CY19-40	2019-06-16	Cyprus	Mathiatis					34.9631514N, 33.3302672E		nest	no	CY19-40_5	offspring	120	120	225	268	101	101	241	241	212	212	96	98
CY19-40_6_Fst_A12.fsa	CY19-40_6	CY19-40	2019-06-16	Cyprus	Mathiatis	Mathiatis				34.9631514N, 33.3302672E	Cyprus	nest	yes	CY19-40_6	mother	120	120	225	268	101	101	241	241	212	212	96	98
CY19-403_1_L3_D09.fsa	CY19-403_1	CY19-403	2019-08-07	Cyprus	Kofinou					34.8242444N, 33.3800892E		nest	no	CY19-403_1	offspring	120	120	225	268	101	105	241	241	212	212	95	98
CY19-403_2_L3_E09.fsa	CY19-403_2	CY19-403	2019-08-07	Cyprus	Kofinou					34.8242444N, 33.3800892E		nest	no	CY19-403_2	offspring	120	120	225	268	101	105	241	241	212	212	95	98
CY19-403_3_L2_F09.fsa	CY19-403_3	CY19-403	2019-08-07	Cyprus	Kofinou					34.8242444N, 33.3800892E		nest	no	CY19-403_3	offspring	120	120	225	268	101	105	241	241	212	212	95	98
CY19-403_4_L2_G09.fsa	CY19-403_4	CY19-403	2019-08-07	Cyprus	Kofinou					34.8242444N, 33.3800892E		nest	no	CY19-403_4	offspring	120	120	225	268	101	105	241	241	212	212	95	98
CY19-403_5_L2_H09.fsa	CY19-403_5	CY19-403	2019-08-07	Cyprus	Kofinou					34.8242444N, 33.3800892E		nest	no	CY19-403_5	offspring	120	120	225	268	101	105	241	241	212	212	95	98
CY19-403_6_Fst_A10.fsa	CY19-403_6	CY19-403	2019-08-07	Cyprus	Kofinou	Lefkara	Kofinou	Rubus		34.8242444N, 33.3800892E	Cyprus	nest	yes	CY19-403_6	mother	120	120	225	268	101	105	241	241	212	212	95	98
CY19-404_2_L4_B10.fsa	CY19-404_2	CY19-404	2019-08-07	Cyprus	Kofinou					34.8242444N, 33.3800892E		nest	no	CY19-404_2	offspring	143	143	225	268	101	101	229	243	212	212	95	98
CY19-404_4_E_C10.fsa	CY19-404_4	CY19-404	2019-08-07	Cyprus	Kofinou					34.8242444N, 33.3800892E		nest	no	CY19-404_4	offspring	143	143	225	268	101	101	229	243	212	212	95	98
CY19-404_5_FstE09_E09.fsa	CY19-404_5	CY19-404	2019-08-07	Cyprus	Kofinou	Lefkara	Kofinou	Rubus		34.8242444N, 33.3800892E	Cyprus	nest	yes	CY19-404_5	mother	143	143	225	268	101	101	229	243	212	212	95	98
CY19-49_2_E_A02.fsa	CY19-49_2	CY19-49	2019-06-16	Cyprus	Mathiatis					34.9631514N, 33.3302672E		nest	no	CY19-49_2	offspring	143	143	225	268	101	101	241	243	212	212	96	98
CY19-49_3_Fst_B02.fsa	CY19-49_3	CY19-49	2019-06-16	Cyprus	Mathiatis	Mathiatis				34.9631514N, 33.3302672E	Cyprus	nest	yes	CY19-49_3	mother	143	143	225	268	101	101	241	243	212	212	96	98
CY19-593_2_FimF08_F08.fsa	CY19-593_2	CY19-593	2019-08-10	Cyprus	Lefkara					34.8895478N, 33.3267911E		nest	no	CY19-593_2	offspring	120	120	225	270	101	101	241	243	212	212	96	98
CY19-593_4_FstG08_G08.fsa	CY19-593_4	CY19-593	2019-08-10	Cyprus	Lefkara	Lefkara	walley	Asphodelus	1	34.8895478N, 33.3267911E	Cyprus	nest	yes	CY19-593_4	mother	120	120	225	270	101	101	241	243	212	212	96	98
CY19-610_1_FimH07_H07.fsa	CY19-610_1	CY19-610	2019-08-10	Cyprus	Lefkara					34.8895478N, 33.3267911E		nest	no	CY19-610_1	offspring	120	120	225	268	101	101	229	243	212	212	95	98
CY19-610_4_L4A08_A08.fsa	CY19-610_4	CY19-610	2019-08-10	Cyprus	Lefkara					34.8895478N, 33.3267911E		nest	no	CY19-610_4	offspring	120	120	225	268	101	101	229	243	212	212	95	98
CY19-610_5_FstB08_B08.fsa	CY19-610_5	CY19-610	2019-08-10	Cyprus	Lefkara	Lefkara	walley	Asteraceae_other	1	34.8895478N, 33.3267911E	Cyprus	nest	yes	CY19-610_5	mother	120	120	225	268	101	101	229	243	212	212	95	98
CY19-662_2_FimC06_C06.fsa	CY19-662_2	CY19-662	2019-08-11	Cyprus	Lempa					34.8115744N, 32.4041108E		nest	no	CY19-662_2	offspring	120	120	225	270	101	101	229	241	212	212	95	98
CY19-662_4_L3D06_D06.fsa	CY19-662_4	CY19-662	2019-08-11	Cyprus	Lempa					34.8115744N, 32.4041108E		nest	no	CY19-662_4	offspring	120	120	225	270	101	101	229	241	212	212	95	98
CY19-662_5_EE06_E06.fsa	CY19-662_5	CY19-662	2019-08-11	Cyprus	Lempa					34.8115744N, 32.4041108E		nest	no	CY19-662_5	offspring	120	120	225	270	101	101	229	241	212	212	95	98
CY19-662_6_FstF06_F06.fsa	CY19-662_6	CY19-662	2019-08-11	Cyprus	Lempa					34.8115744N, 32.4041108E	Cyprus	nest	yes	CY19-662_6	mother	120	120	225	270	101	101	229	241	212	212	95	98
CY19-991_2_Pb_B12.fsa	CY19-991_2	CY19-991	2019-09-20	Cyprus	Lefkara					34.8729906N, 33.3037608E		nest	no	CY19-991_2	offspring	120	143	225	268	101	105	229	241	212	212	95	98
CY19-991_3_Pb_C12.fsa	CY19-991_3	CY19-991	2019-09-20	Cyprus	Lefkara					34.8729906N, 33.3037608E		nest	no	CY19-991_3	offspring	120	143	225	268	101	105	229	241	212	212	95	98
CY19-991_4_Fst_D12.fsa	CY19-991_4	CY19-991	2019-09-20	Cyprus	Lefkara	Lefkara	under_willage	Ferula	1	34.8729906N, 33.3037608E	Cyprus	nest	yes	CY19-991_4	mother	120	143	225	268	101	105	229	241	212	212	95	98
CY19-999_1_L4C08_C08.fsa	CY19-999_1	CY19-999	2019-09-20	Cyprus	Lefkara					34.8729906N, 33.3037608E		nest	no	CY19-999_1	offspring	143	143	225	268	101	101	243	243	212	212	95	98
CY19-999_2_L1D08_D08.fsa	CY19-999_2	CY19-999	2019-09-20	Cyprus	Lefkara					34.8729906N, 33.3037608E		nest	no	CY19-999_2	offspring	143	143	225	268	101	101	243	243	212	212	95	98
CY19-999_3_FstE08_E08.fsa	CY19-999_3	CY19-999	2019-09-20	Cyprus	Lefkara	Lefkara	under_willage	Ferula		34.8729906N, 33.3037608E	Cyprus	nest	yes	CY19-999_3	mother	143	143	225	268	101	101	243	243	212	212	95	98
CY19-D115_3_L2_A01.fsa	CY19-D115_3	CY19-D115	2019-06-26	Cyprus	Pyrgos					34.7277206N, 33.1875267E		nest	no	CY19-D115_3	offspring	120	120	225	268	101	105	241	241	212	212	95	98
CY19-D115_4_L1_B01.fsa	CY19-D115_4	CY19-D115	2019-06-26	Cyprus	Pyrgos					34.7277206N, 33.1875267E		nest	no	CY19-D115_4	offspring	120	120	225	268	101	105	241	241	212	212	95	98
CY19-D115_5_Fst_C01.fsa	CY19-D115_5	CY19-D115	2019-06-26	Cyprus	Pyrgos	Pyrgos				34.7277206N, 33.1875267E	Cyprus	nest	yes	CY19-D115_5	mother	120	120	225	268	101	105	241	241	212	212	95	98
CY19-D116_1_E_D01.fsa	CY19-D116_1	CY19-D116	2019-06-26	Cyprus	Pyrgos					34.7277206N, 33.1875267E		nest	no	CY19-D116_1	offspring	143	143	225	268	101	101	229	243	212	212	95	98
CY19-D116_3_Fst_E01.fsa	CY19-D116_3	CY19-D116	2019-06-26	Cyprus	Pyrgos	Pyrgos				34.7277206N, 33.1875267E	Cyprus	nest	yes	CY19-D116_3	mother	143	143	225	268	101	101	229	243	212	212	95	98
CY19-D132_4_L4F05_F05.fsa	CY19-D132_4	CY19-D132	2019-08-06	Cyprus	Kofinou					34.8242444N, 33.3800892E		nest	no	CY19-D132_4	offspring	120	143	225	268	101	101	241	241	212	212	96	98
CY19-D132_5_L3G05_G05.fsa	CY19-D132_5	CY19-D132	2019-08-06	Cyprus	Kofinou					34.8242444N, 33.3800892E		nest	no	CY19-D132_5	offspring	120	143	225	268	101	101	241	241	212	212	96	98
CY19-D132_6_FstH05_H05.fsa	CY19-D132_6	CY19-D132	2019-08-06	Cyprus	Kofinou	Lefkara	Kofinou	Rubus	1	34.8242444N, 33.3800892E	Cyprus	nest	yes	CY19-D132_6	mother	120	143	225	268	101	101	241	241	212	212	96	98
CY19-D149_1_EA06_A06.fsa	CY19-D149_1	CY19-D149	2019-08-07	Cyprus	Lefkara					34.8736114N, 33.3101006E		nest	no	CY19-D149_1	offspring	143	143	225	268	101	101	243	243	212	212	96	98
CY19-D149_2_FstB06_B06.fsa	CY19-D149_2	CY19-D149	2019-08-07	Cyprus	Lefkara	Lefkara	under_willage	Apiaceae_other	1	34.8736114N, 33.3101006E	Cyprus	nest	yes	CY19-D149_2	mother	143	143	225	268	101	101	243	243	212	212	96	98
CY19-D213_2_L3_E12.fsa	CY19-D213_2	CY19-D213	2019-08-09	Cyprus	Lefkara					34.8681464N, 33.2882861E		nest	no	CY19-D213_2	offspring	143	143	225	268	101	101	229	243	212	212	95	98
CY19-D213_3_L2_F12.fsa	CY19-D213_3	CY19-D213	2019-08-09	Cyprus	Lefkara					34.8681464N, 33.2882861E		nest	no	CY19-D213_3	offspring	143	143	225	268	101	101	229	243	212	212	95	98
CY19-D213_4_E_G12.fsa	CY19-D213_4	CY19-D213	2019-08-09	Cyprus	Lefkara					34.8681464N, 33.2882861E		nest	no	CY19-D213_4	offspring	143	143	225	268	101	101	229	243	212	212	95	98
CY19-D213_5_Fst_H12.fsa	CY19-D213_5	CY19-D213	2019-08-09	Cyprus	Lefkara	Lefkara	over_willage	Apiaceae_other	1	34.8681464N, 33.2882861E	Cyprus	nest	yes	CY19-D213_5	mother	143	143	225	268	101	101	229	243	212	212	95	98
CY19-D51_3_EG06_G06.fsa	CY19-D51_3	CY19-D51	2019-06-18	Cyprus	Lefkara					34.8888739N, 33.3288125E		nest	no	CY19-D51_3	offspring	120	120	225	268	101	101	241	241	212	212	96	98
CY19-D51_4_FstH06_H06.fsa	CY19-D51_4	CY19-D51	2019-06-18	Cyprus	Lefkara	Lefkara	walley	Rubus	1	34.8888739N, 33.3288125E	Cyprus	nest	yes	CY19-D51_4	mother	120	120	225	268	101	101	241	241	212	212	96	98
CY19-D77_1_L4A07_A07.fsa	CY19-D77_1	CY19-D77	2019-06-20	Cyprus	Lefkara					34.8677953N, 33.2933942E		nest	no	CY19-D77_1	offspring	143	145	225	268	101	101	243	243	212	212	96	98
CY19-D77_3_L3B07_B07.fsa	CY19-D77_3	CY19-D77	2019-06-20	Cyprus	Lefkara					34.8677953N, 33.2933942E		nest	no	CY19-D77_3	offspring	143	145	225	268	101	101	243	243	212	212	96	98
CY19-D77_4_L4C07_C07.fsa	CY19-D77_4	CY19-D77	2019-06-20	Cyprus	Lefkara					34.8677953N, 33.2933942E		nest	no	CY19-D77_4	offspring	143	145	225	268	101	101	243	243	212	212	96	98
CY19-D77_5_L3D07_D07.fsa	CY19-D77_5	CY19-D77	2019-06-20	Cyprus	Lefkara					34.8677953N, 33.2933942E		nest	no	CY19-D77_5	offspring	143	145	225	268	101	101	243	243	212	212	96	98
CY19-D77_6_EE07_E07.fsa	CY19-D77_6	CY19-D77	2019-06-20	Cyprus	Lefkara					34.8677953N, 33.2933942E		nest	no	CY19-D77_6	offspring	143	145	225	268	101	101	243	243	212	212	96	98
CY19-D77_7_EF07_F07.fsa	CY19-D77_7	CY19-D77	2019-06-20	Cyprus	Lefkara					34.8677953N, 33.2933942E		nest	no	CY19-D77_7	offspring	143	145	225	268	101	101	243	243	212	212	96	98
CY19-D77_8_FstG07_G07.fsa	CY19-D77_8	CY19-D77	2019-06-20	Cyprus	Lefkara	Lefkara	over_willage	Foeniculum_vulgare	1	34.8677953N, 33.2933942E	Cyprus	nest	yes	CY19-D77_8	mother	143	145	225	268	101	101	243	243	212	212	96	98
CY18-108FstH10_H10.fsa	CY18-108	CY18-108	2018-05-27	Cyprus	Lefkara	Lefkara	under_willage	Foeniculum_vulgare	1	34.8729747N, 33.3088883E	Cyprus		yes	CY18-108	NA	120	143	225	268	101	105	229	241	212	212	95	98
CY19-1073FF08_F08.fsa	CY19-1073	CY19-1073	2019-09-21	Cyprus	Lefkara	Lefkara	under_willage	Rubus	1	34.8730244N, 33.3089411E	Cyprus		yes	CY19-1073	NA	143	143	225	268	101	101	241	243	212	212	96	98
CY19-1074FG08_G08.fsa	CY19-1074	CY19-1074	2019-09-21	Cyprus	Lefkara	Lefkara	under_willage	Rubus		34.8730244N, 33.3089411E	Cyprus		yes	CY19-1074	NA	143	143	225	268	101	101	241	243	212	212	96	98
CY19-1077FA09_A09.fsa	CY19-1077	CY19-1077	2019-09-21	Cyprus	Lefkara	Lefkara	under_willage	Rubus		34.8730244N, 33.3089411E	Cyprus		yes	CY19-1077	NA	143	143	225	268	101	101	229	243	212	212	95	98
CY19-1078FB09_B09.fsa	CY19-1078	CY19-1078	2019-09-21	Cyprus	Lefkara	Lefkara	under_willage	Rubus		34.8730244N, 33.3089411E	Cyprus		yes	CY19-1078	NA	120	120	225	268	101	101	241	241	212	212	96	98
CY19-1083FC09_C09.fsa	CY19-1083	CY19-1083	2019-09-21	Cyprus	Lefkara	Lefkara	under_willage	Rubus		34.8730244N, 33.3089411E	Cyprus		yes	CY19-1083	NA	120	120	225	270	101	101	229	243	212	212	95	98
CY19-1084FD09_D09.fsa	CY19-1084	CY19-1084	2019-09-21	Cyprus	Lefkara	Lefkara	under_willage	Rubus		34.8730244N, 33.3089411E	Cyprus		yes	CY19-1084	NA	143	143	225	268	101	101	229	243	212	212	95	98
CY19-1085FE09_E09.fsa	CY19-1085	CY19-1085	2019-09-21	Cyprus	Lefkara	Lefkara	under_willage	Rubus		34.8730244N, 33.3089411E	Cyprus		yes	CY19-1085	NA	140	143	225	268	101	101	243	243	212	212	96	98
CY19-1089FF09_F09.fsa	CY19-1089	CY19-1089	2019-09-21	Cyprus	Lefkara	Lefkara	under_willage	Rubus		34.8730244N, 33.3089411E	Cyprus		yes	CY19-1089	NA	143	143	225	268	101	101	229	243	212	212	95	98
CY19-1090FG09_G09.fsa	CY19-1090	CY19-1090	2019-09-21	Cyprus	Lefkara	Lefkara	under_willage	Rubus		34.8730244N, 33.3089411E	Cyprus		yes	CY19-1090	NA	120	120	225	268	101	101	241	241	212	212	96	98
CY19-1094FC10_C10.fsa	CY19-1094	CY19-1094	2019-09-21	Cyprus	Lefkara	Lefkara	under_willage	Rubus		34.8730244N, 33.3089411E	Cyprus		yes	CY19-1094	NA	120	120	225	268	101	105	241	241	212	212	95	98
CY19-1096FH09_H09.fsa	CY19-1096	CY19-1096	2019-09-21	Cyprus	Lefkara	Lefkara	under_willage	Rubus		34.8730244N, 33.3089411E	Cyprus		yes	CY19-1096	NA	143	143	225	268	101	101	241	243	212	212	96	98
CY19-1104FB10_B10.fsa	CY19-1104	CY19-1104	2019-09-21	Cyprus	Lefkara	Lefkara	under_willage	Rubus		34.8730244N, 33.3089411E	Cyprus		yes	CY19-1104	NA	143	143	225	268	101	101	241	243	212	212	96	96
CY19-1128FH11_H11.fsa	CY19-1128	CY19-1128	2019-09-21	Cyprus	Lefkara	Lefkara	under_willage	Rubus		34.8730244N, 33.3089411E	Cyprus		yes	CY19-1128	NA	120	120	225	225	101	101	229	241	212	212	96	98
CY19-1129FG11_G11.fsa	CY19-1129	CY19-1129	2019-09-21	Cyprus	Lefkara	Lefkara	under_willage	Rubus		34.8730244N, 33.3089411E	Cyprus		yes	CY19-1129	NA	143	145	225	268	101	101	243	243	212	212	96	98
CY19-1158FF11_F11.fsa	CY19-1158	CY19-1158	2019-09-22	Cyprus	Agios Theodoros	Agios Theodoros				34.7629750N, 33.4071689E	Cyprus		yes	CY19-1158	NA	120	120	225	268	101	101	241	241	212	212	96	98
CY19-147FD11_D11.fsa	CY19-147	CY19-147	2019-06-17	Cyprus	Lefkara	Lefkara	walley	Rubus	1	34.8826242N, 33.3316900E	Cyprus		yes	CY19-147	NA	120	120	225	270	101	101	241	241	212	212	96	98
CY19-443FE10_E10.fsa	CY19-443	CY19-443	2019-08-08	Cyprus	Lefkara	Lefkara	over_willage	Foeniculum_vulgare	1	34.8669564N, 33.3030831E	Cyprus		yes	CY19-443	NA	145	145	225	268	101	101	241	243	212	212	96	98
CY19-528FG10_G10.fsa	CY19-528	CY19-528	2019-08-09	Cyprus	Lefkara	Lefkara	white_church	Rubus	1	34.8621000N, 33.3065306E	Cyprus		yes	CY19-528	NA	120	120	225	268	101	105	229	241	212	212	95	98
CY19-538FF10_F10.fsa	CY19-538	CY19-538	2019-08-09	Cyprus	Lefkara	Lefkara	white_church	Rubus		34.8621000N, 33.3065306E	Cyprus		yes	CY19-538	NA	120	120	225	266	101	101	243	243	212	212	96	98
CY19-540FH10_H10.fsa	CY19-540	CY19-540	2019-08-09	Cyprus	Lefkara	Lefkara	white_church	Rubus		34.8621000N, 33.3065306E	Cyprus		yes	CY19-540	NA	120	120	225	268	101	101	229	241	212	212	96	98
CY19-543FA11_A11.fsa	CY19-543	CY19-543	2019-08-09	Cyprus	Lefkara	Lefkara	white_church	Rubus		34.8621000N, 33.3065306E	Cyprus		yes	CY19-543	NA	143	143	225	268	101	101	229	243	212	212	95	96
CY19-598FB11_B11.fsa	CY19-598	CY19-598	2019-08-10	Cyprus	Lefkara	Lefkara	walley	Rubus	1	34.8895478N, 33.3267911E	Cyprus		yes	CY19-598	NA	143	143	225	268	101	101	241	243	212	212	96	98
CY19-711FD10_D10.fsa	CY19-711	CY19-711	2019-09-17	Cyprus	Lefkara	Lefkara	walley	Rubus	1	34.8885425N, 33.3254653E	Cyprus		yes	CY19-711	NA	143	143	225	268	101	101	243	243	212	212	96	98
CY19-914FH08_H08.fsa	CY19-914	CY19-914	2019-09-19	Cyprus	Lefkara	Lefkara	under_willage	Rubus	1	34.8729906N, 33.3037608E	Cyprus		yes	CY19-914	NA	143	143	225	268	101	105	229	241	212	212	95	98
CY19-981FD08_D08.fsa	CY19-981	CY19-981	2019-09-20	Cyprus	Lefkara	Lefkara	over_willage	Foeniculum_vulgare	1	34.8681464N, 33.2882861E	Cyprus		yes	CY19-981	NA	143	143	225	268	101	101	241	243	212	212	96	98
CY19-984FE08_E08.fsa	CY19-984	CY19-984	2019-09-20	Cyprus	Lefkara	Lefkara	over_willage	Foeniculum_vulgare		34.8681464N, 33.2882861E	Cyprus		yes	CY19-984	NA	145	145	225	268	101	101	241	243	212	212	96	98
CY19-D207(4)FE11_E11.fsa	CY19-D207_4	CY19-D207	2019-08-09	Cyprus	Lefkara	Lefkara	over_willage	Foeniculum_vulgare	1	34.8681464N, 33.2882861E	Cyprus		yes	CY19-D207_4	NA	143	143	225	268	101	101	241	243	212	212	96	98
CY19-D227FC08_C08.fsa	CY19-D227	CY19-D227	2019-08-09	Cyprus	Lefkara	Lefkara	white_church	Rubus	1	34.8621000N, 33.3065306E	Cyprus		yes	CY19-D227	NA	138	145	225	268	101	101	241	241	212	212	96	96
CY19-D235FC11_C11.fsa	CY19-D235	CY19-D235	2019-08-09	Cyprus	Lefkara	Lefkara	white_church	Rubus		34.8621000N, 33.3065306E	Cyprus		yes	CY19-D235	NA	143	143	225	268	101	101	229	243	212	212	95	98
CY19-D236FB08_B08.fsa	CY19-D236	CY19-D236	2019-08-09	Cyprus	Lefkara	Lefkara	white_church	Rubus		34.8621000N, 33.3065306E	Cyprus		yes	CY19-D236	NA	143	143	225	268	101	101	243	243	212	212	96	98
CY19-D237FA08_A08.fsa	CY19-D237	CY19-D237	2019-08-09	Cyprus	Lefkara	Lefkara	white_church	Rubus		34.8621000N, 33.3065306E	Cyprus		yes	CY19-D237	NA	143	143	225	268	101	103	229	243	212	212	95	98
GR13-1FstC12_C12.fsa	GR13-1	GR13-1	2013-10-11	Georgia	Vashlovani	Vashlovani				41.2157186N, 46.4315767E	Georgia		yes	GR13-1	NA	149	153	274	279	99	101	235	235	214	214	95	100
GR13-2FstD12_D12.fsa	GR13-2	GR13-2	2013-10-16	Georgia	Kaspi					41.9396750N, 44.4425825E	Georgia		yes	GR13-2	NA	153	156	279	279	101	101	235	235	214	214	95	100
GR13-3FstE12_E12.fsa	GR13-3	GR13-3	2013-10-11	Georgia	Vashlovani	Vashlovani				41.2157186N, 46.4315767E	Georgia		yes	GR13-3	NA	143	149	235	279	97	97	208	210	214	214	95	98
GR13-4FstF12_F12.fsa	GR13-4	GR13-4	2013-10-13	Georgia	Dedoplis Tskaro					41.4744822N, 46.1083597E	Georgia		yes	GR13-4	NA	126	126	254	274	99	101	208	208	212	214	95	100
GR13-5FstG12_G12.fsa	GR13-5	GR13-5	2013-10-11	Georgia	Vashlovani	Vashlovani				41.2157186N, 46.4315767E	Georgia		yes	GR13-5	NA	143	149	235	279	97	97	208	210	214	214	95	98
GR13-6FstH12_H12.fsa	GR13-6	GR13-6	2013-10-11	Georgia	Vashlovani	Vashlovani				41.2157186N, 46.4315767E	Georgia		yes	GR13-6	NA	126	126	254	274	99	101	208	247	212	214	95	100
GR14-1FstH10_H10.fsa	GR14-1	GR14-1	2014-08-12	Georgia	Kvareli	Kvareli				41.9479622N, 45.8218778E	Georgia		yes	GR14-1	NA	143	143	274	279	97	99	210	247	214	214	100	100
GR14-2FstA11_A11.fsa	GR14-2	GR14-2	2014-08-12	Georgia	Kvareli	Kvareli				41.9479622N, 45.8218778E	Georgia		yes	GR14-2	NA	126	149	254	274	99	101	208	247	212	212	95	100
GR14-3FstB11_B11.fsa	GR14-3	GR14-3	2014-08-15	Georgia	Lagokhi					41.8282819N, 46.2860433E	Georgia		yes	GR14-3	NA	143	149	240	266	97	101	210	235	214	214	100	100
GR14-4FstC11_C11.fsa	GR14-4	GR14-4	2014-08-15	Georgia	Lagokhi					41.8282819N, 46.2860433E	Georgia		yes	GR14-4	NA	126	143	240	274	99	101	208	210	214	214	98	100
GR14-5FstD11_D11.fsa	GR14-5	GR14-5	2014-08-12	Georgia	Kvareli	Kvareli				41.9479622N, 45.8218778E	Georgia		yes	GR14-5	NA	143	149	235	279	97	97	208	210	214	214	95	98
CA-1_1_L3A09_A09.fsa	CA-1_1	CA-1	2013-08-05	Italy	Cassino					41.4892753N, 13.7943347E		nest	no	CA-1_1	offspring	126	162	240	263	101	101	231	235	214	214	95	98
CA-1_2_L3B09_B09.fsa	CA-1_2	CA-1	2013-08-05	Italy	Cassino					41.4892753N, 13.7943347E		nest	no	CA-1_2	offspring	126	162	240	263	101	101	231	235	214	214	95	98
CA-1_3_L3C09_C09.fsa	CA-1_3	CA-1	2013-08-05	Italy	Cassino					41.4892753N, 13.7943347E		nest	no	CA-1_3	offspring	126	162	240	263	101	101	231	235	214	214	95	98
CA-1_4_L3D09_D09.fsa	CA-1_4	CA-1	2013-08-05	Italy	Cassino					41.4892753N, 13.7943347E		nest	no	CA-1_4	offspring	126	162	240	263	101	101	231	235	214	214	95	98
CA-1_5_L3E09_E09.fsa	CA-1_5	CA-1	2013-08-05	Italy	Cassino					41.4892753N, 13.7943347E		nest	no	CA-1_5	offspring	126	162	240	263	101	101	231	235	214	214	95	98
CA-1_6_L3F09_F09.fsa	CA-1_6	CA-1	2013-08-05	Italy	Cassino					41.4892753N, 13.7943347E		nest	no	CA-1_6	offspring	126	162	240	263	101	101	231	235	214	214	95	98
CA-1_7_L3G09_G09.fsa	CA-1_7	CA-1	2013-08-05	Italy	Cassino					41.4892753N, 13.7943347E		nest	no	CA-1_7	offspring	126	162	240	263	101	101	231	235	214	214	95	98
CA-1_8_FstH09_H09.fsa	CA-1_8	CA-1	2013-08-05	Italy	Cassino	Cassino				41.4892753N, 13.7943347E	Italy	nest	yes	CA-1_8	mother	126	162	240	263	101	101	231	235	214	214	95	98
I17-356_1_L2H04_H04.fsa	I17-356_1	I17-356	2017-06-24	Italy	Gravina					40.8278744N, 16.4066481E		nest	no	I17-356_1	offspring	126	126	242	265	101	101	208	235	214	214	100	100
I17-356_2_L1A05_A05.fsa	I17-356_2	I17-356	2017-06-24	Italy	Gravina					40.8278744N, 16.4066481E		nest	no	I17-356_2	offspring	126	126	242	265	101	101	208	235	214	214	100	100
I17-356_3_FstB05_B05.fsa	I17-356_3	I17-356	2017-06-24	Italy	Gravina					40.8278744N, 16.4066481E	Italy	nest	yes	I17-356_3	mother	126	126	242	265	101	101	208	235	214	214	100	100
I17-470_1_EC10_C10.fsa	I17-470_1	I17-470	2017-06-28	Italy	Pescariello					40.9071747N, 16.6312539E		nest	no	I17-470_1	offspring	128	128	240	240	101	101	208	231	214	214	98	100
I17-470_2_FstD10_D10.fsa	I17-470_2	I17-470	2017-06-28	Italy	Pescariello	Pescariello				40.9071747N, 16.6312539E	Italy	nest	yes	I17-470_2	mother	128	128	240	240	101	101	208	231	214	214	98	100
I17-528_1_L2B07_B07.fsa	I17-528_1	I17-528	2017-06-29	Italy	Pescariello					40.9071747N, 16.6312539E		nest	no	I17-528_1	offspring	126	149	240	261	101	101	231	235	214	214	98	100
I17-528_2_L1C07_C07.fsa	I17-528_2	I17-528	2017-06-29	Italy	Pescariello					40.9071747N, 16.6312539E		nest	no	I17-528_2	offspring	126	149	240	261	101	101	231	235	214	214	98	100
I17-528_3_ED07_D07.fsa	I17-528_3	I17-528	2017-06-29	Italy	Pescariello					40.9071747N, 16.6312539E		nest	no	I17-528_3	offspring	126	149	240	261	101	101	231	235	214	214	98	100
I17-528_4_FstE07_E07.fsa	I17-528_4	I17-528	2017-06-29	Italy	Pescariello	Pescariello				40.9071747N, 16.6312539E	Italy	nest	yes	I17-528_4	mother	126	149	240	261	101	101	231	235	214	214	98	100
I17-647_1_L4A10_A10.fsa	I17-647_1	I17-647	2017-06-30	Italy	Pescariello					40.8702706N, 16.6262756E		nest	no	I17-647_1	offspring	126	126	240	242	101	101	208	235	214	214	100	100
I17-647_2_L2D05_D05.fsa	I17-647_2	I17-647	2017-06-30	Italy	Pescariello					40.8702706N, 16.6262756E		nest	no	I17-647_2	offspring	126	126	240	242	101	101	208	235	214	214	100	100
I17-647_3_L1E05_E05.fsa	I17-647_3	I17-647	2017-06-30	Italy	Pescariello					40.8702706N, 16.6262756E		nest	no	I17-647_3	offspring	126	126	240	242	101	101	208	235	214	214	100	100
I17-647_4_EF05_F05.fsa	I17-647_4	I17-647	2017-06-30	Italy	Pescariello					40.8702706N, 16.6262756E		nest	no	I17-647_4	offspring	126	126	240	242	101	101	208	235	214	214	100	100
I17-647_5_EG05_G05.fsa	I17-647_5	I17-647	2017-06-30	Italy	Pescariello					40.8702706N, 16.6262756E		nest	no	I17-647_5	offspring	126	126	240	242	101	101	208	235	214	214	100	100
I17-647_6_FstH05_H05.fsa	I17-647_6	I17-647	2017-06-30	Italy	Pescariello	Pescariello				40.8702706N, 16.6262756E	Italy	nest	yes	I17-647_6	mother	126	126	240	242	101	101	208	235	214	214	100	100
I17-655_1_L3A06_A06.fsa	I17-655_1	I17-655	2017-06-30	Italy	Pescariello					40.8702706N, 16.6262756E		nest	no	I17-655_1	offspring	126	149	242	261	101	101	231	231	214	214	98	100
I17-655_2_L3B06_B06.fsa	I17-655_2	I17-655	2017-06-30	Italy	Pescariello					40.8702706N, 16.6262756E		nest	no	I17-655_2	offspring	126	149	242	261	101	101	231	231	214	214	98	100
I17-655_3_L1C06_C06.fsa	I17-655_3	I17-655	2017-06-30	Italy	Pescariello					40.8702706N, 16.6262756E		nest	no	I17-655_3	offspring	126	149	242	261	101	101	231	231	214	214	98	100
I17-655_4_ED06_D06.fsa	I17-655_4	I17-655	2017-06-30	Italy	Pescariello					40.8702706N, 16.6262756E		nest	no	I17-655_4	offspring	126	149	242	261	101	101	231	231	214	214	98	100
I17-655_5_FstE06_E06.fsa	I17-655_5	I17-655	2017-06-30	Italy	Pescariello	Pescariello				40.8702706N, 16.6262756E	Italy	nest	yes	I17-655_5	mother	126	149	242	261	101	101	231	231	214	214	98	100
I17-682_1_L1F06_F06.fsa	I17-682_1	I17-682	2017-06-30	Italy	Pescariello					40.8702706N, 16.6262756E		nest	no	I17-682_1	offspring	120	149	238	263	101	101	235	235	214	214	100	102
I17-682_2_EG06_G06.fsa	I17-682_2	I17-682	2017-06-30	Italy	Pescariello					40.8702706N, 16.6262756E		nest	no	I17-682_2	offspring	120	149	238	263	101	101	235	235	214	214	100	102
I17-682_3_EH06_H06.fsa	I17-682_3	I17-682	2017-06-30	Italy	Pescariello					40.8702706N, 16.6262756E		nest	no	I17-682_3	offspring	120	149	238	263	101	101	235	235	214	214	100	102
I17-682_4_FstA07_A07.fsa	I17-682_4	I17-682	2017-06-30	Italy	Pescariello	Pescariello				40.8702706N, 16.6262756E	Italy	nest	yes	I17-682_4	mother	120	149	238	263	101	101	235	235	214	214	100	102
SM-10_1_PbA10_A10.fsa	SM-10_1	SM-10	2013-08-09	Italy	Santa Marinella					42.0601342N, 11.8514847E		nest	no	SM-10_1	offspring	128	147	261	266	97	101	231	235	214	214	98	98
SM-10_2_PbB10_B10.fsa	SM-10_2	SM-10	2013-08-09	Italy	Santa Marinella					42.0601342N, 11.8514847E		nest	no	SM-10_2	offspring	128	147	261	266	97	101	231	235	214	214	98	98
SM-10_3_L3C10_C10.fsa	SM-10_3	SM-10	2013-08-09	Italy	Santa Marinella					42.0601342N, 11.8514847E		nest	no	SM-10_3	offspring	128	147	261	266	97	101	231	235	214	214	98	98
SM-10_4_L3D10_D10.fsa	SM-10_4	SM-10	2013-08-09	Italy	Santa Marinella					42.0601342N, 11.8514847E		nest	no	SM-10_4	offspring	128	147	261	266	97	101	231	235	214	214	98	98
SM-10_5_L3E10_E10.fsa	SM-10_5	SM-10	2013-08-09	Italy	Santa Marinella					42.0601342N, 11.8514847E		nest	no	SM-10_5	offspring	128	147	261	266	97	101	231	235	214	214	98	98
SM-10_6_FstF10_F10.fsa	SM-10_6	SM-10	2013-08-09	Italy	Santa Marinella	Santa Marinella				42.0601342N, 11.8514847E	Italy	nest	yes	SM-10_6	mother	128	147	261	266	97	101	231	235	214	214	98	98
SM-3_1_PbF07_F07.fsa	SM-3_1	SM-3	2013-08-08	Italy	Santa Marinella					42.0601342N, 11.8514847E		nest	no	SM-3_1	offspring	128	143	261	268	97	101	231	235	214	214	98	98
SM-3_2_L4G07_G07.fsa	SM-3_2	SM-3	2013-08-08	Italy	Santa Marinella					42.0601342N, 11.8514847E		nest	no	SM-3_2	offspring	128	143	261	268	97	101	231	235	214	214	98	98
SM-3_4_L3H07_H07.fsa	SM-3_4	SM-3	2013-08-08	Italy	Santa Marinella					42.0601342N, 11.8514847E		nest	no	SM-3_4	offspring	128	143	261	268	97	101	231	235	214	214	98	98
SM-3_5_L3A08_A08.fsa	SM-3_5	SM-3	2013-08-08	Italy	Santa Marinella					42.0601342N, 11.8514847E		nest	no	SM-3_5	offspring	128	143	261	268	97	101	231	235	214	214	98	98
SM-3_6_L3B08_B08.fsa	SM-3_6	SM-3	2013-08-08	Italy	Santa Marinella					42.0601342N, 11.8514847E		nest	no	SM-3_6	offspring	128	143	261	268	97	101	231	235	214	214	98	98
SM-3_7_L3C08_C08.fsa	SM-3_7	SM-3	2013-08-08	Italy	Santa Marinella					42.0601342N, 11.8514847E		nest	no	SM-3_7	offspring	128	143	261	268	97	101	231	235	214	214	98	98
SM-3_8_FstD08_D08.fsa	SM-3_8	SM-3	2013-08-08	Italy	Santa Marinella	Santa Marinella				42.0601342N, 11.8514847E	Italy	nest	yes	SM-3_8	mother	128	143	261	268	97	101	231	235	214	214	98	98
SM-7_1_P-E08_E08.fsa	SM-7_1	SM-7	2013-08-09	Italy	Santa Marinella					42.0601342N, 11.8514847E		nest	no	SM-7_1	offspring	151	151	261	261	101	101	212	235	214	214	98	98
SM-7_2_FimF08_F08.fsa	SM-7_2	SM-7	2013-08-09	Italy	Santa Marinella					42.0601342N, 11.8514847E		nest	no	SM-7_2	offspring	151	151	261	261	101	101	212	235	214	214	98	98
SM-7_3_FstG08_G08.fsa	SM-7_3	SM-7	2013-08-09	Italy	Santa Marinella	Santa Marinella				42.0601342N, 11.8514847E	Italy	nest	yes	SM-7_3	mother	151	151	261	261	101	101	212	235	214	214	98	98
I-31FstB12_B12.fsa	I-31	I-31	2012-11-01	Italy	Cassino	Cassino				41.4862239N, 13.7979128E	Italy		yes	I-31	NA	126	162	240	263	101	101	231	235	214	214	95	98
I-40FstA12_A12.fsa	I-40	I-40	2012-10-30	Italy	Cassino	Cassino				41.4862239N, 13.7979128E	Italy		yes	I-40	NA	128	128	238	276	97	101	208	208	214	214	98	98
MA14-1FstE10_E10.fsa	MA14-1	MA14-1	2014-05-10	Northern Macedonia	Ohrid					41.0996944N, 20.8215278E	Other		yes	MA14-1	NA	126	126	268	274	97	99	212	235	214	214	95	100
MA14-2FstF10_F10.fsa	MA14-2	MA14-2	2014-05-07	Northern Macedonia	Vojshanci					41.4737500N, 22.1811667E	Other		yes	MA14-2	NA	140	140	263	272	101	101	208	235	212	212	100	102
MA14-3FstG10_G10.fsa	MA14-3	MA14-3	2014-05-07	Northern Macedonia	Vojshanci					41.4737500N, 22.1811667E	Other		yes	MA14-3	NA	126	126	240	270	101	101	212	256	214	214	95	98
TA19-10_2_EA03_A03.fsa	TA19-10_2	TA19-10	2019-07-04	Tajikistan	Dzarteppa					38.0197706N, 69.3592158E		nest	no	TA19-10_2	offspring	153	153	240	259	101	101	212	212	214	214	98	103
TA19-10_3_FstB03_B03.fsa	TA19-10_3	TA19-10	2019-07-04	Tajikistan	Dzarteppa					38.0197706N, 69.3592158E	Tajikistan	nest	yes	TA19-10_3	mother	153	153	240	259	99	101	212	235	214	214	95	100
TA19-159_3_FimA01_A01.fsa	TA19-159_3	TA19-159	2019-07-09	Tajikistan	Sharistan					39.7800442N, 68.8118569E		nest	no	TA19-159_3	offspring	127	127	259	270	99	101	208	208	214	214	95	100
TA19-159_4_FimB01_B01.fsa	TA19-159_4	TA19-159	2019-07-09	Tajikistan	Sharistan					39.7800442N, 68.8118569E		nest	no	TA19-159_4	offspring	127	127	259	270	99	101	208	208	214	214	95	100
TA19-159_5_FimC01_C01.fsa	TA19-159_5	TA19-159	2019-07-09	Tajikistan	Sharistan					39.7800442N, 68.8118569E		nest	no	TA19-159_5	offspring	127	127	259	270	99	101	208	208	214	214	95	100
TA19-159_6_fstD01_D01.fsa	TA19-159_6	TA19-159	2019-07-09	Tajikistan	Sharistan	Sharistan				39.7800442N, 68.8118569E	Tajikistan	nest	yes	TA19-159_6	mother	127	127	259	270	99	101	208	208	214	214	95	100
TA19-160_2_FimE01_E01.fsa	TA19-160_2	TA19-160	2019-07-09	Tajikistan	Sharistan					39.7800442N, 68.8118569E		nest	no	TA19-160_2	offspring	127	153	259	270	99	101	208	212	214	214	95	100
TA19-160_3_FimF01_F01.fsa	TA19-160_3	TA19-160	2019-07-09	Tajikistan	Sharistan					39.7800442N, 68.8118569E		nest	no	TA19-160_3	offspring	127	153	259	270	99	101	208	212	214	214	95	100
TA19-160_4_FimG01_G01.fsa	TA19-160_4	TA19-160	2019-07-09	Tajikistan	Sharistan					39.7800442N, 68.8118569E		nest	no	TA19-160_4	offspring	127	153	259	270	99	101	208	212	214	214	95	100
TA19-160_5_FimH01_H01.fsa	TA19-160_5	TA19-160	2019-07-09	Tajikistan	Sharistan					39.7800442N, 68.8118569E		nest	no	TA19-160_5	offspring	127	153	259	270	99	101	208	212	214	214	95	100
TA19-160_6_FimA02_A02.fsa	TA19-160_6	TA19-160	2019-07-09	Tajikistan	Sharistan					39.7800442N, 68.8118569E		nest	no	TA19-160_6	offspring	127	153	259	270	99	101	208	212	214	214	95	100
TA19-160_7_FstB02_B02.fsa	TA19-160_7	TA19-160	2019-07-09	Tajikistan	Sharistan	Sharistan				39.7800442N, 68.8118569E	Tajikistan	nest	yes	TA19-160_7	mother	127	153	259	270	99	101	208	212	214	214	95	100
TA19-163_2_FimC02_C02.fsa	TA19-163_2	TA19-163	2019-07-10	Tajikistan	Sharistan					39.7800442N, 68.8118569E		nest	no	TA19-163_2	offspring	127	153	259	270	99	101	208	212	214	214	95	100
TA19-163_3_FstD02_D02.fsa	TA19-163_3	TA19-163	2019-07-10	Tajikistan	Sharistan	Sharistan				39.7800442N, 68.8118569E	Tajikistan	nest	yes	TA19-163_3	mother	127	153	259	270	99	101	208	212	214	214	95	100
TA19-175_5_L4E02_E02.fsa	TA19-175_5	TA19-175	2019-07-10	Tajikistan	Sharistan					39.7584769N, 68.7915722E		nest	no	TA19-175_5	offspring	127	153	259	270	99	101	208	212	214	214	95	100
TA19-175_6_L4F02_F02.fsa	TA19-175_6	TA19-175	2019-07-10	Tajikistan	Sharistan					39.7584769N, 68.7915722E		nest	no	TA19-175_6	offspring	127	153	259	270	99	101	208	212	214	214	95	100
TA19-175_7_L3G02_G02.fsa	TA19-175_7	TA19-175	2019-07-10	Tajikistan	Sharistan					39.7584769N, 68.7915722E		nest	no	TA19-175_7	offspring	127	153	259	270	99	101	208	212	214	214	95	100
TA19-175_8_FstH02_H02.fsa	TA19-175_8	TA19-175	2019-07-10	Tajikistan	Sharistan	Sharistan				39.7584769N, 68.7915722E	Tajikistan	nest	yes	TA19-175_8	mother	127	153	259	270	99	101	208	212	214	214	95	100
TA19-203_1_L4A05_A05.fsa	TA19-203_1	TA19-203	2019-07-14	Tajikistan	Dushanbe					38.4568586N, 68.7844932E		nest	no	TA19-203_1	offspring	153	153	240	259	99	101	212	235	214	214	95	100
TA19-203_2_L4B05_B05.fsa	TA19-203_2	TA19-203	2019-07-14	Tajikistan	Dushanbe					38.4568586N, 68.7844932E		nest	no	TA19-203_2	offspring	153	153	240	259	99	101	212	235	214	214	95	100
TA19-203_3_L4C05_C05.fsa	TA19-203_3	TA19-203	2019-07-14	Tajikistan	Dushanbe					38.4568586N, 68.7844932E		nest	no	TA19-203_3	offspring	153	153	240	259	99	101	212	235	214	214	95	100
TA19-203_4_L3D05_D05.fsa	TA19-203_4	TA19-203	2019-07-14	Tajikistan	Dushanbe					38.4568586N, 68.7844932E		nest	no	TA19-203_4	offspring	153	153	240	259	99	101	212	235	214	214	95	100
TA19-203_5_FstE05_E05.fsa	TA19-203_5	TA19-203	2019-07-14	Tajikistan	Dushanbe					38.4568586N, 68.7844932E	Tajikistan	nest	yes	TA19-203_5	mother	153	153	240	259	99	101	212	235	214	214	95	100
TA19-38_1_FimC03_C03.fsa	TA19-38_1	TA19-38	2019-07-05	Tajikistan	Dzarteppa					38.0197706N, 69.3592158E		nest	no	TA19-38_1	offspring	153	153	240	259	99	101	212	212	214	214	95	100
TA19-38_2_FimD03_D03.fsa	TA19-38_2	TA19-38	2019-07-05	Tajikistan	Dzarteppa					38.0197706N, 69.3592158E		nest	no	TA19-38_2	offspring	153	153	240	259	99	101	212	212	214	214	95	100
TA19-38_3_FimE03_E03.fsa	TA19-38_3	TA19-38	2019-07-05	Tajikistan	Dzarteppa					38.0197706N, 69.3592158E		nest	no	TA19-38_3	offspring	153	153	240	259	99	101	212	212	214	214	95	100
TA19-38_4_FimF03_F03.fsa	TA19-38_4	TA19-38	2019-07-05	Tajikistan	Dzarteppa					38.0197706N, 69.3592158E		nest	no	TA19-38_4	offspring	153	153	240	259	99	101	212	212	214	214	95	100
TA19-38_5_FstG03_G03.fsa	TA19-38_5	TA19-38	2019-07-05	Tajikistan	Dzarteppa					38.0197706N, 69.3592158E	Tajikistan	nest	yes	TA19-38_5	mother	153	153	240	259	99	101	212	212	214	214	95	100
TA19-70_1_PeH03_H03.fsa	TA19-70_1	TA19-70	2019-07-06	Tajikistan	Rozien					38.2706964N, 69.2591528E		nest	no	TA19-70_1	offspring	143	160	238	238	99	101	216	216	212	214	103	103
TA19-70_2_PeA04_A04.fsa	TA19-70_2	TA19-70	2019-07-06	Tajikistan	Rozien					38.2706964N, 69.2591528E		nest	no	TA19-70_2	offspring	153	153	259	259	99	101	231	235	214	214	95	100
TA19-70_3_PbB04_B04.fsa	TA19-70_3	TA19-70	2019-07-06	Tajikistan	Rozien					38.2706964N, 69.2591528E		nest	no	TA19-70_3	offspring	153	153	240	259	99	101	212	235	214	214	95	100
TA19-70_4_FimC04_C04.fsa	TA19-70_4	TA19-70	2019-07-06	Tajikistan	Rozien					38.2706964N, 69.2591528E		nest	no	TA19-70_4	offspring	153	153	240	259	99	101	212	235	214	214	95	100
TA19-70_5_FstD04_D04.fsa	TA19-70_5	TA19-70	2019-07-06	Tajikistan	Rozien					38.2706964N, 69.2591528E	Tajikistan	nest	yes	TA19-70_5	mother	153	153	240	259	99	101	212	235	214	214	95	100
TA19-75_1_FimE04_E04.fsa	TA19-75_1	TA19-75	2019-07-06	Tajikistan	Rozien					38.2706964N, 69.2591528E		nest	no	TA19-75_1	offspring	153	153	240	259	99	101	212	235	214	214	95	100
TA19-75_2_FimF04_F04.fsa	TA19-75_2	TA19-75	2019-07-06	Tajikistan	Rozien					38.2706964N, 69.2591528E		nest	no	TA19-75_2	offspring	153	153	240	259	99	101	212	235	214	214	95	100
TA19-75_3_fimG04_G04.fsa	TA19-75_3	TA19-75	2019-07-06	Tajikistan	Rozien					38.2706964N, 69.2591528E		nest	no	TA19-75_3	offspring	153	153	240	259	99	101	212	235	214	214	95	100
TA19-75_4_FstH04_H04.fsa	TA19-75_4	TA19-75	2019-07-06	Tajikistan	Rozien					38.2706964N, 69.2591528E	Tajikistan	nest	yes	TA19-75_4	mother	153	153	240	259	99	101	212	235	214	214	95	100
TA19-30gynaB10_B10.fsa	TA19-30_gynadromorph	TA19-30	2019-07-05	Tajikistan	Dzarteppa					38.0197706N, 69.3592158E			NA	TA19-30	NA	153	153	240	240	99	99	235	235	214	214	95	95
